# Supplementary material for: Seismogenic depth and seismic coupling estimation in the transition zone between Alps, Dinarides and Pannonian Basin for the new Slovenian seismic hazard model
Source: Copernicus journal article supplement (doi:10.5194/nhess-24-651-2024), 2024-02-27
Supplement: Supplementary file 1 [file nhess-24-651-2024-supplement.pdf]

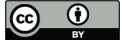

*Supplement of*

**Seismogenic depth and seismic coupling estimation in the transition zone between Alps, Dinarides and Pannonian Basin for the new Slovenian seismic hazard model**

**Polona Zupančič et al.**

*Correspondence to:* Polona Zupančič ([polona.zupancic@gov.si](mailto:polona.zupancic@gov.si))

The copyright of individual parts of the supplement might differ from the article licence.

**Table S1. FS and their fault activity, faulting style, seismogenic thickness, seismic coupling  $c$  (mean, min, max) following Carafa et al. (2017), weighted coupling factor, and weighted coupling factor multiplied with the best estimate of slip rate. For 22 FS from EDSF (Basili et al., 2013), the coupling factor was set to 1.0. The FS are sorted by seismic source acronym.**

| Seismic source name  | Seismic source acronym | Fault activity | Faulting style class  | Seismogenic thickness (km) | $c$ mean | $c$ min | $c$ max | Weighted coupling (0.7 * $c$ mean + 0.3 * 0.7) or 1.0 | best slip rate * weighed coupling (mm yr <sup>-1</sup> ) |
|----------------------|------------------------|----------------|-----------------------|----------------------------|----------|---------|---------|-------------------------------------------------------|----------------------------------------------------------|
| Buzet                | SS.SI-002              | potentially    | thrust                | 7                          | 0.53     | 0.43    | 0.63    | 0.58                                                  | 0.03                                                     |
| Sočerga-Lupoglav     | SS.SI-003              | potentially    | dextral transpressive | n/a                        | n/a      | n/a     | n/a     | 1.00                                                  | 0.16                                                     |
| Črni Kal - Palmanova | SS.SI-006              | active         | thrust                | 7                          | 0.53     | 0.43    | 0.63    | 0.58                                                  | 0.12                                                     |
| Divača               | SS.SI-011              | probably       | dextral strike-slip   | 6                          | 0.80     | 0.65    | 0.95    | 0.77                                                  | 0.15                                                     |
| Raša                 | SS.SI-014              | active         | dextral strike-slip   | 17                         | 0.28     | 0.23    | 0.34    | 0.41                                                  | 0.29                                                     |
| Vipava               | SS.SI-015              | questionable   | dextral strike-slip   | 10                         | 0.48     | 0.39    | 0.57    | 0.55                                                  | 0.03                                                     |
| Predjama-Avče        | SS.SI-019              | active         | dextral strike-slip   | 17                         | 0.28     | 0.23    | 0.34    | 0.41                                                  | 0.29                                                     |
| Jesenovec            | SS.SI-020              | questionable   | dextral strike-slip   | 10                         | 0.48     | 0.39    | 0.57    | 0.55                                                  | 0.03                                                     |
| Idrija               | SS.SI-022              | active         | dextral strike-slip   | 16                         | 0.30     | 0.24    | 0.36    | 0.42                                                  | 0.42                                                     |
| Podplanina-Podpreska | SS.SI-023              | questionable   | dextral transpressive | 10                         | 0.48     | 0.39    | 0.57    | 0.55                                                  | 0.03                                                     |
| Ravne                | SS.SI-025              | active         | dextral strike-slip   | 15                         | 0.32     | 0.26    | 0.38    | 0.43                                                  | 0.04                                                     |
| Čeplez               | SS.SI-026              | potentially    | dextral strike-slip   | 17                         | 0.28     | 0.23    | 0.34    | 0.41                                                  | 0.02                                                     |
| Vrhnika              | SS.SI-027              | potentially    | dextral transpressive | 18                         | 0.27     | 0.22    | 0.32    | 0.40                                                  | 0.02                                                     |
| Rakitna              | SS.SI-029              | potentially    | dextral transpressive | 16                         | 0.30     | 0.24    | 0.36    | 0.42                                                  | 0.04                                                     |
| Jalovec              | SS.SI-031              | questionable   | sinistral strike-slip | 12                         | 0.40     | 0.33    | 0.48    | 0.49                                                  | 0.05                                                     |
| Mojstrovka           | SS.SI-032              | questionable   | sinistral strike-slip | 12                         | 0.40     | 0.33    | 0.48    | 0.49                                                  | 0.05                                                     |
| Vrata                | SS.SI-033              | questionable   | sinistral strike-slip | 10                         | 0.48     | 0.39    | 0.57    | 0.55                                                  | 0.05                                                     |
| Krma                 | SS.SI-034              | questionable   | sinistral strike-slip | 10                         | 0.48     | 0.39    | 0.57    | 0.55                                                  | 0.05                                                     |
| Možic-Sorica         | SS.SI-035              | potentially    | dextral strike-slip   | 10                         | 0.48     | 0.39    | 0.57    | 0.55                                                  | 0.03                                                     |
| Mišja dolina         | SS.SI-037              | active         | dextral strike-slip   | 16                         | 0.30     | 0.24    | 0.36    | 0.42                                                  | 0.19                                                     |
| Dražgoše             | SS.SI-040              | probably       | dextral strike-slip   | 10                         | 0.48     | 0.39    | 0.57    | 0.55                                                  | 0.05                                                     |
| Želimlje-Ortnek      | SS.SI-041              | probably       | dextral strike-slip   | 15                         | 0.32     | 0.26    | 0.38    | 0.43                                                  | 0.20                                                     |

|                  |            |              |                         |    |      |      |      |      |      |
|------------------|------------|--------------|-------------------------|----|------|------|------|------|------|
| Dobrepolje       | SS.SI-043  | probably     | dextral strike-slip     | 15 | 0.32 | 0.26 | 0.38 | 0.43 | 0.20 |
| Zasip            | SS.SI-044  | potentially  | dextral strike-slip     | 10 | 0.48 | 0.39 | 0.57 | 0.55 | 0.05 |
| Kranj            | SS.SI-045  | potentially  | dextral strike-slip     | 12 | 0.40 | 0.33 | 0.48 | 0.49 | 0.05 |
| Žužemberk        | SS.SI-046  | active       | dextral strike-slip     | 15 | 0.32 | 0.26 | 0.38 | 0.43 | 0.22 |
| Sava W           | SS.SI-047a | active       | dextral transpressive   | 15 | 0.32 | 0.26 | 0.38 | 0.43 | 0.43 |
| Sava E-Celje     | SS.SI-047b | active       | dextral transpressive   | 15 | 0.32 | 0.26 | 0.38 | 0.43 | 0.43 |
| Vodice           | SS.SI-049  | active       | reverse                 | 10 | 0.37 | 0.30 | 0.44 | 0.47 | 0.14 |
| Stična           | SS.SI-050  | probably     | dextral strike-slip     | 12 | 0.40 | 0.33 | 0.48 | 0.49 | 0.02 |
| Toplice          | SS.SI-051  | active       | dextral strike-slip     | 12 | 0.40 | 0.33 | 0.48 | 0.49 | 0.02 |
| Košuta           | SS.SI-052  | potentially  | reverse                 | 12 | 0.31 | 0.25 | 0.37 | 0.43 | 0.13 |
| Stol (Hochstuhl) | SS.SI-053  | probably     | dextral strike-slip     | 15 | 0.32 | 0.26 | 0.38 | 0.43 | 0.17 |
| Cerklje          | SS.SI-054  | active       | dextral transpressive   | 10 | 0.48 | 0.39 | 0.57 | 0.55 | 0.16 |
| Periadriatic W   | SS.SI-056a | probably     | dextral transpressive   | 20 | 0.24 | 0.20 | 0.29 | 0.38 | 0.23 |
| Periadriatic E   | SS.SI-056b | probably     | dextral transpressive   | 20 | 0.24 | 0.20 | 0.29 | 0.38 | 0.23 |
| Litija           | SS.SI-057  | potentially  | dextral strike-slip     | 12 | 0.40 | 0.33 | 0.48 | 0.49 | 0.02 |
| Trebnje          | SS.SI-058  | potentially  | dextral strike-slip     | 13 | 0.37 | 0.30 | 0.44 | 0.47 | 0.02 |
| Gornji Grad      | SS.SI-060  | questionable | sinistral strike-slip   | 12 | 0.40 | 0.33 | 0.48 | 0.49 | 0.02 |
| Logarska dolina  | SS.SI-061  | questionable | sinistral strike-slip   | 12 | 0.40 | 0.33 | 0.48 | 0.49 | 0.02 |
| Menina-Vransko   | SS.SI-062  | potentially  | reverse                 | 12 | 0.31 | 0.25 | 0.37 | 0.43 | 0.13 |
| Zagorje          | SS.SI-066  | probably     | dextral strike-slip     | 12 | 0.40 | 0.33 | 0.48 | 0.49 | 0.03 |
| Poštena vas      | SS.SI-068  | potentially  | sinistral transpressive | 9  | 0.53 | 0.43 | 0.63 | 0.58 | 0.05 |
| Savinja          | SS.SI-070  | questionable | sinistral strike-slip   | 12 | 0.40 | 0.33 | 0.48 | 0.49 | 0.02 |
| Hrastnik         | SS.SI-071  | probably     | dextral strike-slip     | 12 | 0.40 | 0.33 | 0.48 | 0.49 | 0.03 |
| Orlica 1         | SS.SI-074a | probably     | reverse                 | 9  | 0.41 | 0.33 | 0.49 | 0.50 | 0.04 |
| Orlica 2         | SS.SI-074b | probably     | sinistral strike-slip   | 9  | 0.53 | 0.43 | 0.63 | 0.58 | 0.05 |
| Orlica 3         | SS.SI-074c | probably     | sinistral transpressive | 8  | 0.60 | 0.49 | 0.71 | 0.63 | 0.05 |
| Artiče           | SS.SI-075  | active       | reverse                 | 8  | 0.46 | 0.38 | 0.55 | 0.53 | 0.05 |
| Šoštanj W        | SS.SI-076a | active       | dextral strike-slip     | 15 | 0.32 | 0.26 | 0.38 | 0.43 | 0.22 |

|                             |            |             |                         |     |      |      |      |      |      |
|-----------------------------|------------|-------------|-------------------------|-----|------|------|------|------|------|
| Šoštanj E                   | SS.SI-076b | potentially | sinistral transpressive | 15  | 0.32 | 0.26 | 0.38 | 0.43 | 0.04 |
| Northern Karavanke          | SS.SI-078  | potentially | thrust                  | 5   | 0.74 | 0.60 | 0.88 | 0.73 | 0.22 |
| Labot N                     | SS.SI-080a | active      | dextral strike-slip     | 15  | 0.32 | 0.26 | 0.38 | 0.43 | 0.33 |
| Labot S                     | SS.SI-080b | active      | dextral strike-slip     | 14  | 0.34 | 0.28 | 0.41 | 0.45 | 0.34 |
| Haloze                      | SS.SI-081  | potentially | reverse                 | 8   | 0.46 | 0.38 | 0.55 | 0.53 | 0.03 |
| Lovrenc                     | SS.SI-085  | potentially | reverse                 | 10  | 0.37 | 0.30 | 0.44 | 0.47 | 0.02 |
| Donat                       | SS.SI-086  | potentially | dextral strike-slip     | 10  | 0.48 | 0.39 | 0.57 | 0.55 | 0.35 |
| Kungota                     | SS.SI-088  | potentially | sinistral transpressive | 10  | 0.48 | 0.39 | 0.57 | 0.55 | 0.03 |
| Ljutomer                    | SS.SI-089  | probably    | reverse                 | 10  | 0.37 | 0.30 | 0.44 | 0.47 | 0.01 |
| Fella                       | SS.SI-090  | probably    | reverse                 | 15  | 0.25 | 0.20 | 0.29 | 0.38 | 0.19 |
| Gemona-Kobarid              | SS.SI-091  | potentially | thrust                  | n/a | n/a  | n/a  | n/a  | 1.00 | 0.42 |
| Raša West                   | SS.SI-092  | active      | dextral strike-slip     | 15  | 0.32 | 0.26 | 0.38 | 0.43 | 0.30 |
| Orehovec                    | SS.SI-093  | probably    | sinistral strike-slip   | 12  | 0.40 | 0.33 | 0.48 | 0.49 | 0.10 |
| Sveta Nedelja               | SS.SI-094  | active      | sinistral strike-slip   | 15  | 0.32 | 0.26 | 0.38 | 0.43 | 0.10 |
| North Medvednica            | SS.SI-095  | active      | sinistral transpressive | 16  | 0.30 | 0.24 | 0.36 | 0.42 | 0.08 |
| Kašina                      | SS.SI-096  | active      | dextral transtensive    | 10  | 0.48 | 0.39 | 0.57 | 0.55 | 0.11 |
| Montebelluna-Montereale     | SS.SI-097  | active      | thrust                  | n/a | n/a  | n/a  | n/a  | 1.00 | 0.43 |
| Trasaghis-Taipana           | SS.SI-098  | potentially | thrust                  | n/a | n/a  | n/a  | n/a  | 1.00 | 0.42 |
| Maniago-Sequals             | SS.SI-099  | active      | thrust                  | n/a | n/a  | n/a  | n/a  | 1.00 | 0.42 |
| Medea                       | SS.SI-100  | probably    | dextral transpressive   | n/a | n/a  | n/a  | n/a  | 1.00 | 0.16 |
| Gemona-Tarcento             | SS.SI-101  | active      | thrust                  | n/a | n/a  | n/a  | n/a  | 1.00 | 0.42 |
| Andreis-Forgaria nel Friuli | SS.SI-102  | potentially | thrust                  | n/a | n/a  | n/a  | n/a  | 1.00 | 0.42 |
| Bassano-Vittorio Veneto     | SS.SI-103  | active      | thrust                  | n/a | n/a  | n/a  | n/a  | 1.00 | 0.42 |
| Trstenik                    | SS.SI-104  | potentially | dextral transpressive   | n/a | n/a  | n/a  | n/a  | 1.00 | 0.08 |
| Velebit                     | SS.SI-105  | probably    | reverse                 | n/a | n/a  | n/a  | n/a  | 1.00 | 0.20 |
| Vinodol-Rijeka              | SS.SI-106  | probably    | dextral transpressive   | n/a | n/a  | n/a  | n/a  | 1.00 | 0.26 |
| Krk                         | SS.SI-107  | potentially | dextral transpressive   | n/a | n/a  | n/a  | n/a  | 1.00 | 0.16 |
| Žuta Lokva                  | SS.SI-108  | potentially | reverse                 | n/a | n/a  | n/a  | n/a  | 1.00 | 0.16 |

|             |           |              |                       |     |      |      |      |      |      |
|-------------|-----------|--------------|-----------------------|-----|------|------|------|------|------|
| Plitvice    | SS.SI-109 | potentially  | reverse               | n/a | n/a  | n/a  | n/a  | 1.00 | 0.16 |
| Mala Kapela | SS.SI-111 | potentially  | dextral transpressive | n/a | n/a  | n/a  | n/a  | 1.00 | 0.16 |
| Slunj       | SS.SI-112 | potentially  | dextral transpressive | n/a | n/a  | n/a  | n/a  | 1.00 | 0.14 |
| Bosiljevo   | SS.SI-113 | potentially  | dextral transpressive | n/a | n/a  | n/a  | n/a  | 1.00 | 0.14 |
| Novo Selo   | SS.SI-114 | potentially  | dextral transpressive | n/a | n/a  | n/a  | n/a  | 1.00 | 0.18 |
| Molltal     | SS.SI-115 | potentially  | dextral strike-slip   | 15  | 0.32 | 0.26 | 0.38 | 0.43 | 0.17 |
| Mur-Murz    | SS.SI-116 | active       | sinistral strike-slip | 15  | 0.32 | 0.26 | 0.38 | 0.43 | 0.65 |
| Gorjanci    | SS.SI-117 | questionable | thrust                | 9   | 0.41 | 0.33 | 0.49 | 0.50 | 0.10 |
| Petrinja    | SS.SI-118 | active       | dextral transpressive | n/a | n/a  | n/a  | n/a  | 1.00 | 0.12 |
| Kalnik      | SS.SI-119 | probably     | sinistral strike-slip | n/a | n/a  | n/a  | n/a  | 1.00 | 0.13 |
| Kutina      | SS.SI-120 | probably     | dextral transpressive | n/a | n/a  | n/a  | n/a  | 1.00 | 0.06 |
